# Supplementary material for: GPR176 Promotes Cancer Progression by Interacting with G Protein GNAS to Restrain Cell Mitophagy in Colorectal Cancer
Source: PubMed Central journal article supplement (PMC10131842; doi:10.1002/advs.202205627), 2023-03-11
Supplement: ADVS-10-2205627-s001.pdf [file ADVS-10-2205627-s001.pdf]

## Supporting Information

for *Adv. Sci.*, DOI 10.1002/adv.202205627

GPR176 Promotes Cancer Progression by Interacting with G Protein GNAS to Restrain Cell Mitophagy in Colorectal Cancer

*Junwei Tang, Wen Peng, Jiangzhou Ji, Chaofan Peng, Tuo Wang, Peng Yang, Ji'ou Gu, Yifei Feng, Kangpeng Jin\*, Xiaowei Wang\* and Yueming Sun\**

## Supplementary Materials

**GPR176 promotes cancer progression by interacting with G protein GNAS to restrain cell mitophagy in colorectal cancer**

Junwei Tang<sup>1, 2, #</sup>, Wen Peng<sup>1, 2, #</sup>, Jiangzhou Ji<sup>1, 2, 3, #</sup>, Chaofan Peng<sup>1, 2, 3</sup>, Tuo Wang<sup>1, 2, 3</sup>, Peng Yang<sup>1, 2, 3</sup>, Ji'ou Gu<sup>1, 2</sup>, Yifei Feng<sup>1, 2</sup>, Kangpeng Jin<sup>1, 2, \*</sup>, Xiaowei Wang<sup>1, 2, 3, \*</sup>, Yueming Sun<sup>1, 2, \*</sup>

<sup>1</sup> Department of General Surgery, The First Affiliated Hospital of Nanjing Medical University, Nanjing Jiangsu, 210029, China; <sup>2</sup> Colorectal Institute of Nanjing Medical University, Nanjing, China; <sup>3</sup> The First School of Clinical Medicine, Nanjing Medical University, Nanjing, China

**#Equal contribution**

**\*Corresponding authors**

**This file includes:**

Supplementary Methods

Supplementary Table 1-2

Supplementary Figure legends

Supplementary Figure 1-7

**Contract information**

Dr. Yueming Sun

E-mail address: sunyueming@njmu.edu.cn

Department of General Surgery, The First Affiliated Hospital of Nanjing Medical University, Colorectal Institute of Nanjing Medical University, Nanjing, Jiangsu, 210029, China. Phone: +862568306026; Fax: +862568306026

## **Supplementary Methods**

### **Patient samples**

After providing informed consent, tissue samples were collected from patients who underwent surgery at the First Affiliated Hospital of Nanjing Medical University between 2009 and 2010. All experiments were performed in compliance with government policies and the Declaration of Helsinki. This study was approved by the human ethics committee of the First Affiliated Hospital of Nanjing Medical University.

### **Cell proliferation and migration assay**

Cell counting Kit-8 (CCK-8, Dojindo, Japan), EdU (ab222421, Abcam, US), and plate colony assays were used to quantify the growth of the CRC cells. Corning Transwell (8.0 um pore polycarbonate membrane insert, Cat#3422) was used to evaluate cell migration. All procedures were performed following the manufacturer's protocols.

### **Cell cycle and apoptosis analysis**

For the cell cycle assay, pretreated cells were stained with propidium iodide (PI) (BD Biosciences), according to the manufacturer's instructions. For the apoptosis assay, pretreated cells were collected by centrifugation and resuspended in 500  $\mu$ L 1X binding buffer. Then 5  $\mu$ L of annexin V-FITC and 5  $\mu$ L of PI were added and incubated in the dark for 5 minutes. Finally, the percentage of apoptotic cells was quantified by flow cytometry.

### **RNA-seq and enrichment analysis**

Total RNA was extracted from tumor tissues and cancer cells using TRIzol reagent (Thermo Fisher Scientific Inc., Waltham, MA, USA). RNA-seq and data analysis were performed by CapitalBio Technology (Beijing, China). GO enrichment analysis, GSEA and visualization of DEGs were performed using the cluster Profiler R package[1]. Genes with adjusted P-values < 0.05 were considered significantly enriched by DEGs.

### **Cell culture**

Human CRC cell lines (SW480, SW620, RKO, HT29, DLD-1, HCT116, and LoVo) and normal epithelial cells of the colon (FHC) were obtained from the Cell Bank of Type Culture Collection of the Chinese Academy of Sciences (Shanghai, China). All cells were cultured in their corresponding medium, incubated in a 5% CO<sub>2</sub> humidified incubator at 37°C.

#### **sh/siRNAs and lentivirus production**

For transient transfection, Lipofectamine 3000 and Opti-MEM (Invitrogen) were used, according to the manufacturer's instructions. The lentivirus used for the stable knockdown or overexpression of genes was designed and purchased from OBiO Technology (Shanghai, China). All sequences are listed in **Supplementary Table 2**.

#### **RNA preparation and qRT-PCR**

Total RNA of cells and tissues was obtained and then reverse transcribed into cDNA using the PrimeScript RT reagent kit (TaKaRa, Dalian, China). The SYBR Premix Ex Taq Kit (TaKaRa) was used to perform qRT-PCR on an Applied Biosystems 7500 Sequence Detection System (Applied Biosystems). Primer sequences for qRT-PCR are listed in **Supplementary Table 2**.

#### **Western blot and immunohistochemistry**

For western blot assay, protein lysates were extracted from tissues and cultured cells using RIPA buffer (Beyotime, China). A BCA kit (Beyotime) was used to quantify the protein concentration. Equal amounts of protein were separated using SDS-PAGE. For IHC, tumor samples were embedded in paraffin and sectioned into 4 mm slices. The slices were first incubated with primary antibodies against the target antigens. Secondary antibodies were used to bind to the primary antibody and detected using the detection system. Antibodies against phospho-IMMT (Ser528) and phospho-MIC19 (Thr11) were generated using the synthetic phospho-peptides[2]. All antibodies used in this experiment are listed in (**supplementary table 2**).

#### **Generation of GPR176<sup>CKO</sup> mice**

GPR176 conditional knockout mice (GPR176<sup>CKO</sup>) with the deletion of *GPR176* **exons 1–4** in intestinal cells were constructed using Cre recombinase expressed by the intestinal-cell-specific villin 1 (Vil1) promoter. The GPR176<sup>FL/FL</sup> mice were first

generated by breeding the floxed allele into homozygosity and then crossed with Vill-Cre mice to obtain GPR176<sup>-CKO</sup> mice. All the mice were on the C57BL/6 background.

### **Animal models**

All animal experiments were approved by the Animal Care and Use Committee of Nanjing Medical University and were performed according to the guidelines of the National Institutes of Health. For the AOM/DSS model, female C57BL6 mice (8 weeks of age) were maintained at the Animal Core Facility of Nanjing Medical University. Briefly, GPR176<sup>-CKO</sup> or GPR176<sup>FL/FL</sup> mice were injected intraperitoneally with AOM (10 mg/kg body weight) (Sigma-Aldrich). After 1 week of AOM administration, the mice received 2% (w/v) DSS (MP Biochemicals) in drinking water for 5 days, followed by a rest period without DSS for 2 weeks. This 5-day cycle was repeated twice. All mice were sacrificed on day 84, and the colon was excised and flushed with PBS. Subsequently, the colon was inspected, photographed, and stained with hematoxylin and eosin. The body weight of the mice was recorded over time from day one. For the tumor-bearing model, 5-week-old male BALB/c nude mice were used. Briefly, CRC cells stably transfected with certain shRNAs, or normal controls were injected subcutaneously into the right or left flank of the mice. Tumor growth was monitored every 3 days. All mice were sacrificed approximately 5 weeks later, and the tumors were dissected and embedded in paraffin for hematoxylin and eosin and IHC staining. The mice described in Supplementary Figure S3E were fed with liensinine (10 mg/kg/day in drinking water)[3] (Pureone Bio Technology; #P0943)

### **Electron microscopy**

Samples, including tumor tissues and CRC cells, were fixed in 4% formaldehyde and 1% glutaraldehyde. They were then processed for transmission electron microscopy using a Hitachi H-500 electron microscope (FEI, USA).

### **MitoTracker Red**

To assess the mitochondrial membrane potential in CRC cells, a MitoTracker Red kit (Invitrogen) was used (final concentration 100 nM). Briefly, cells were grown on coverslips inside a Petri dish. When the cells reached the desired confluency, they

were fixed with growth medium containing 3% formaldehyde at 37°C for 15 min. After fixation, the cells were rinsed three times in PBS and stained with a solution containing MitoTracker Red for 20 min at 37°C. All cells were then observed under a fluorescence microscope (Leica Microsystems CMS Gmbh Ernst-Leitz-Str, 17-37) and analyzed using Leica Application Suite X, 3.6.20104.0.

### **Enzyme-linked immunosorbent assay**

Human cAMP enzyme-linked immunosorbent assay kits (E-EL-0056c) were purchased from ElabScience (Wuhan, China). Briefly, 50 µl of the standard or test samples was added to the plate. Then, 50 µl of biotinylated antibody was immediately added to each well and incubated at 37°C for 45 min. After washing three times, 100 µl of HRP-conjugated working solution was added to each well and incubated at 37°C for 30 min, followed by the addition of 90 µl substrate solution and incubation at 37°C for 15 min. Next, the terminating solution was added, and absorbance values were read at 450 nm.

### **Co-immunoprecipitation assay**

The Co-IP assay was performed as described previously[4]. The corresponding antibodies were used to capture the protein complexes. The precipitate was then subjected to western blotting or mass spectrum analysis.

### **Immunofluorescence assay (IF)**

IF was performed as previously described[5]. First, the test cells were grown to the appropriate density and then washed with PBS. Fixed cells in PBS containing 10% formalin for 10 minutes. The cells were rinsed in PBS-Tween 20 for  $2 \times 2$  min, followed by serum blocking and incubation in a primary antibody dilution buffer for 1 h at 25°C. The cells were then incubated with a secondary antibody for 20–30 minutes at 25°C. After rinsing in PBS-Tween 20 for  $3 \times 2$  min, the procedures were performed using the second antibody. After the above steps were completed, samples were stained with DAPI and analyzed with a confocal microscope.

### **Homology modeling**

We generated GPR176 and GNAS homology models using the Advanced Homology Modeling tool based on the Maestro platform in Schrodinger (2015. v4). The GPR176

model was based on PBD:5G53 and *GNAS* was based on 1SVS. The potential binding locations were established based on the homology models. Mutant plasmids were then constructed using OBiO Technology (Shanghai, China).

### Statistical analysis

All statistical analyses were performed by using R-software (version 4.1.0) and visualized by using Prism (La Jolla, CA, USA). Chi-square test, Student's *t*-test, and Pearson's correlation analysis were used. All experiments were independently repeated at least three times. Figures were prepared using Serif Affinity Photo (Serif, UK).  $P < 0.05$  was considered statistically significant (\*,  $p < 0.05$ ; \*\*,  $p < 0.01$ ; \*\*\*,  $p < 0.001$ ; \*\*\*\*,  $p < 0.0001$ ).

### References

- [1] a) T. Wu, E. Hu, S. Xu, M. Chen, P. Guo, Z. Dai, T. Feng, L. Zhou, W. Tang, L. Zhan, X. Fu, S. Liu, X. Bo, G. Yu, *Innovation (Camb)* **2021**, 2 (3), 100141, <https://doi.org/10.1016/j.xinn.2021.100141>; b) G. Yu, L. G. Wang, Y. Han, Q. Y. He, *Omic* **2012**, 16 (5), 284, <https://doi.org/10.1089/omi.2011.0118>.
- [2] S. Akabane, M. Uno, N. Tani, S. Shimazaki, N. Ebara, H. Kato, H. Kosako, T. Oka, *Molecular cell* **2016**, 62 (3), 371, <https://doi.org/10.1016/j.molcel.2016.03.037>.
- [3] J. Zhou, G. Li, Y. Zheng, H. M. Shen, X. Hu, Q. L. Ming, C. Huang, P. Li, N. Gao, *Autophagy* **2015**, 11 (8), 1259, <https://doi.org/10.1080/15548627.2015.1056970>.
- [4] L. Dan, L. Liu, Y. Sun, J. Song, Q. Yin, G. Zhang, F. Qi, Z. Hu, Z. Yang, Z. Zhou, Y. Hu, L. Zhang, J. Ji, X. Zhao, Y. Jin, M. A. McNutt, Y. Yin, *Nat Immunol* **2020**, 21 (3), 287, <https://doi.org/10.1038/s41590-019-0577-9>.
- [5] Y. Yin, X. Xu, J. Tang, W. Zhang, G. Zhangyuan, J. Ji, L. Deng, S. Lu, H. Zhuo, B. Sun, *Hepatology (Baltimore, Md.)* **2018**, 68 (5), 1865, <https://doi.org/10.1002/hep.30068>.

## Supplementary Tables

**Supplementary Table 1. The clinicopathological characteristics of patients with CRC.**

|                              |          | GPR176 <sup>high</sup> | GPR176 <sup>low</sup> | <i>p</i> value <sup>a</sup> |
|------------------------------|----------|------------------------|-----------------------|-----------------------------|
|                              | <b>n</b> | <b>n=135</b>           | <b>n=134</b>          |                             |
| <b>Age(years)</b>            |          |                        |                       |                             |
| <60                          | 122      | 63                     | 59                    | 0.664                       |
| ≥60                          | 147      | 72                     | 75                    |                             |
| <b>Gender</b>                |          |                        |                       |                             |
| Male                         | 165      | 86                     | 79                    | 0.424                       |
| Female                       | 104      | 49                     | 55                    |                             |
| <b>Tumor diameter (cm)</b>   |          |                        |                       |                             |
| <3cm                         | 120      | 50                     | 70                    | 0.012                       |
| ≥3cm                         | 149      | 85                     | 64                    |                             |
| <b>Pathologic type</b>       |          |                        |                       |                             |
| ADC                          | 140      | 73                     | 67                    | 0.504                       |
| MADC                         | 129      | 62                     | 67                    |                             |
| <b>Lymph node metastasis</b> |          |                        |                       |                             |
| No                           | 124      | 66                     | 58                    | 0.418                       |
| Yes                          | 145      | 69                     | 76                    |                             |
| <b>T stage</b>               |          |                        |                       |                             |
| T1                           | 48       | 18                     | 30                    | 0.002                       |
| T2                           | 79       | 30                     | 49                    |                             |
| T3                           | 86       | 54                     | 32                    |                             |
| T4                           | 55       | 33                     | 23                    |                             |
| <b>Distant metastasis</b>    |          |                        |                       |                             |
| No                           | 52       | 23                     | 29                    | 0.339                       |
| Yes                          | 217      | 112                    | 105                   |                             |
| <b>Primary tumor site</b>    |          |                        |                       |                             |
| Colon                        | 157      | 81                     | 76                    | 0.585                       |
| Rectum                       | 112      | 54                     | 58                    |                             |

a: Chi-square test, ADC: Adenocarcinoma; MADC: Mucinous adenocarcinoma



## Supplementary Table 2

### 1. Primer sequences

| Name                          | Sequence (5' -> 3')      | Supplier |
|-------------------------------|--------------------------|----------|
| Human-CHRM2(Forward Primer)   | AACTCCTCTAACAATAGCCTGGC  | Realgene |
| Human-CHRM2 (Reverse Primer)  | GTTCCCGATAATGGTCACCAAA   | Realgene |
| Human-CHRM3(Forward Primer)   | CACGTACCGAGCCAAACGAA     | Realgene |
| Human-CHRM3(Reverse Primer)   | AGGACAAAGGAGATGACCCAA    | Realgene |
| Human-OR12D3 (Forward Primer) | TGCACACCTGAGTTTTTGTGG    | Realgene |
| Human-OR12D3(Reverse Primer)  | GGCCAATTCTAAGAGCGGCTT    | Realgene |
| Human-GPR176(Forward Primer)  | TGGACAGGTACTACTCAGTCCT   | Realgene |
| Human-GPR176 (Reverse Primer) | TGGACGTGGCATAGATGTCAG    | Realgene |
| Human-GPR15(Forward Primer)   | TTACTATGCTACGAGCCCAAACCT | Realgene |
| Human-GPR15(Reverse Primer)   | CTCCCATGAGAACAAGGTTC     | Realgene |
| Human-FZD7 (Forward Primer)   | GTGCCAACGGCCTGATGTA      | Realgene |
| Human-FZD7 (Reverse Primer)   | AGGTGAGAACGGTAAAGAGCG    | Realgene |
| Human-OR52B6(Forward Primer)  | GCACCTGCACTATTGCCAGAT    | Realgene |
| Human-OR52B6(Reverse Primer)  | CTGCCAACCCATACCAGACAT    | Realgene |
| Human-DRD3(Forward Primer)    | AGAAGGCAACCCAAATGGTGG    | Realgene |
| Human-DRD3(Reverse Primer)    | TGTCGTGGCACTGTAAAGCTC    | Realgene |
| Human-OR6C75(Forward Primer)  | CACAGTGGCAGGTTGTACTTT    | Realgene |
| Human-OR6C75(Reverse Primer)  | AATGCAGACAGACGTGAATGAA   | Realgene |
| Human-OR10G8(Forward Primer)  | GCGCTCGTGTACTCTTCTGG     | Realgene |
| Human-OR10G8(Reverse Primer)  | CCGAGGCCACTATTCCAACAG    | Realgene |
| Human-SSTR1(Forward Primer)   | CCAGCATCTACTGTCTGACTGT   | Realgene |
| Human-SSTR1(Reverse Primer)   | ATGACGAGCAGCGATAGCAC     | Realgene |
| Human-GLP2R(Forward Primer)   | TCCTGAAATGTCTCTGTACCC    | Realgene |
| Human-GLP2R(Reverse Primer)   | GGCGTTCTCTATCGTCTGCC     | Realgene |
| Human-FZD6(Forward Primer)    | GCGATAGCACAGCCTGCAATA    | Realgene |
| Human-FZD6(Reverse Primer)    | AATGGTAAGAATCACCCACCAC   | Realgene |
| Human-PTGDR(Forward Primer)   | GGTGCTTTATCCAGATGGTCC    | Realgene |
| Human-PTGDR(Reverse Primer)   | GTGCATCGCATAGAGGTTGC     | Realgene |
| Human-VIPR1(Forward Primer)   | TCATCCGAATCCTGCTTCAGA    | Realgene |
| Human-VIPR1(Reverse Primer)   | AGGCGAACATGATGTAGTGTACT  | Realgene |
| Human-OR5A2(Forward Primer)   | CAATCTGCAACCCCTTGCTTT    | Realgene |
| Human-OR5A2(Reverse Primer)   | ACACTGACTATGAAGGTCACCA   | Realgene |
| Mouse-GPR176(Forward Primer)  | GGTGTTATGGTCAACTTGCCG    | Realgene |
| Mouse-GPR176(Reverse Primer)  | AGAGCATCGTATAGATCCACCAG  | Realgene |

## 2. Antibodies

| Name     | Supplier                  | Cat no.    |
|----------|---------------------------|------------|
| GPR176   | Abcam                     | ab122605   |
| GPR176   | G-Biosciences             | ITT2003    |
| BCL2     | Abcam                     | ab182858   |
| BAX      | Proteintech               | 50599-2-Ig |
| CyclinD1 | Abcam                     | ab16663    |
| CDK2     | Abcam                     | ab32147    |
| CDK4     | Abcam                     | ab108357   |
| GAPDH    | Cell Signaling Technology | #5174      |
| Cyto C   | Cell Signaling Technology | #11940     |
| TIMM23   | Abcam                     | ab230253   |
| TOMM20   | Abcam                     | ab186735   |
| ATPB     | Abcam                     | ab14730    |
| p-CREB   | Cell Signaling Technology | #9198      |
| CREB     | Cell Signaling Technology | #9197      |
| p-ERK    | Cell Signaling Technology | #4370      |
| ERK      | Cell Signaling Technology | #4695      |
| p-BNIP3L | Abcam                     | ab109414   |
| BNIP3L   | Abcam                     | ab208190   |
| p-PINK1  | Cell Signaling Technology | #46421     |
| PINK1    | Cell Signaling Technology | #6946      |
| p-DNM1L  | Abcam                     | ab193216   |
| DNM1L    | Abcam                     | ab184247   |
| p-IMMT   | This paper                |            |
| IMMT     | Abcam                     | ab137057   |
| p-MIC19  | This paper                |            |
| MIC19    | Abcam                     | ab224565   |
| p-PRKN   | Cell Signaling Technology | #36728     |
| PRKN     | Cell Signaling Technology | #4211      |
| GNAS     | Abcam                     | ab283266   |
| IgG      | Abcam                     | ab172730   |
| LC3 II   | Abcam                     | ab51520    |

### 3. Knockdown sequences

| Name                | Sense                 | Antisense             | Supplier                |
|---------------------|-----------------------|-----------------------|-------------------------|
| Human-GPR176        | CCCTCCAGAACATCTCCCAT  | TATATTATCAGAACAACAC   | GenePharma,<br>Shanghai |
|                     | GGTACTACTCAGTCCTCTA   | TAGAGGACTGAGTAGTACC   |                         |
|                     | GCTCTGTCTTTCACCTTAA   | TTAAGGTGAAAGACAGAGC   |                         |
| 3'-UTR of<br>GPR176 | GTGTTGTTCTGATAATATATT | TATATTATCAGAACAACACTT |                         |
|                     |                       |                       |                         |
| Human-GNAS          | CTTAGATGTTCCAAATTTA   | TAAATTTGGAACATCTAAG   | GenePharma,<br>Shanghai |
|                     | CTGTGATCCTGTTCTCAA    | TTGAGGAACAGGATCACAG   |                         |
|                     | CAAAGTGCAGGACATCAAA   | TTTGATGTCCTGCACTTTG   |                         |
| Human-BNIP3L        | GGCUCAAGAUGUUUGUAAAUA | UUUACAAACAUCUUGAGCCAG | GenePharma,<br>Shanghai |
|                     | GAGAAUUGUUUCAGAGUUAUU | UACUCUGAAACAAUUCUCUU  |                         |
|                     | CAGAGUUUACUGUUGUUUAGA | UAAACAACAGUAAACUCUGUU |                         |
| Human-PKA           | GCGACATCAAGAACCACAATT | TTGTGGTTCTTGATGTCGCTT | GenePharma,<br>Shanghai |
|                     |                       |                       |                         |

## Supplementary Figure legends

### **Supplementary Figure 1. GPR176 predicted poor prognosis and dysregulated in CRC cells.**

**A**, Kaplan-Meier analysis presented with high and low expression of GPR176 in patients. **B**, The mRNA and protein expression patterns of GPR176 in selected cell lines of CRC. **C**, The validation of GPR176 knockdown efficiency in DLD-1 and HCT116 cells. **D**, The validation of GPR176 overexpression efficiency in DLD-1 and HT-29 cells. Data was presented with Mean $\pm$ SD, \*\*\*  $p < 0.001$  and \*\*  $p < 0.01$ .

### **Supplementary Figure 2. Regulation of GPR176 in the CRC cancer cells.**

**A**, Statistical results of EdU assay in HCT116 and HT-29 cells with indicated treatment. **B-C**, Statistical results of flow cytometry analysis of cell cycle and apoptosis distribution in GPR176 knockdown cells.

### **Supplementary Figure 3. GPR176 affected CRC progression via inhibiting**

**mitophagy. A**, Western blot of mitophagy proteins in GPR176 knockdown cells treated with liensinine. **B-C**, Flow cytometry analysis of cell cycle and apoptosis in GPR176 knockdown cells treated with liensinine. **D**, Representative images of plate colony assay in GPR176 knockdown cells treated with liensinine. **E**, Tumor formation of GPR176 knockdown cells in liensinine fed mice ( $n = 3$  for each group). **F**, Western blot of the key molecules involved in the cell proliferation and apoptosis.

**Supplementary Figure 4. BNIP3L phosphorylation by PKA impairs induction of mitophagy.**

**A, B**, The calculation of the half-maximal inhibitory concentration (IC<sub>50</sub>) of H89 in CRC cells. **C**, CCK-8 assay in GPR176 overexpressed cells treated with H89. **D**, Western blot analysis of the phosphorylation level of CREB and ERK in GPR176 CKO mice model and GPR176 knockdown cells. **E**, Western blot of mitophagy proteins in CRC cells treated with cAMP analog (cAMP) and/or siCREB. **F**, Western blot of several mitophagy regulators in GPR176 knockdown cells. **G**, mRNA expression of BNIP3L and PINK1 in GPR176 knockdown cells. The results of HCT116 were shown here. **H**, Knockdown efficiency of BNIP3L in CRC cells assessed by qPCR and western blot. **I**, Western blot of mitophagy proteins and BNIP3L phosphorylation levels in GPR176 knockdown cells treated with BNIP3L plasmid. **J**, Confocal immunofluorescence analysis in GPR176 knockdown cells treated with BNIP3L plasmid. Data was presented with Mean±SD, \*\*p < 0.01.

**Supplementary Figure 5. GPR176/GNAS complex regulates cell proliferation *in vitro* and *in vivo*.**

The knockdown and overexpression efficiency of GANS in CRC cells assessed by **A**, qPCR and **B**, western blot. **C**, Co-IP assay in 293T cells and CRC cells. **D**, CCK-8 assay and **E**, plate colony in GPR176 overexpressed cells transfected with shGNAS. **F**, Gross images of xenograft model in GPR176 overexpressed cells transfected with shGNAS *in vivo*. **G-H**, Statistical results of xenograft model in GPR176

overexpressed cells transfected with shGNAS plasmid respectively. **I-J**, Plate colony and CCK-8 in GPR176 knockdown cell transfected with GNAS or vector control. Data was presented with Mean $\pm$ SD, \*\*\*p < 0.001, \*\*p < 0.01 and \*p < 0.05, ns indicated no significance.

**Supplementary Figure 6. Effect of GPR176/GNAS complex on CRC progression depends on their interaction.**

**A**, Western blot of GNAS level in GPR176 knockdown cells treated with GPR176 WT or GPR176 Mut2 plasmid. **B**, mRNA level of GNAS in GPR176 knockdown cells. **C**, Western blot of mitophagy proteins in GNAS overexpressed cells treated with GPR176 WT or GPR176 Mut2 plasmid. **D-E**, Flow cytometry analysis of cell cycle and apoptosis in endogenous GPR176 knockdown cells and exogenous GPR176 OE cells treated with GNAS plasmid. **F-G**, CCK-8 assay and plate colony assay in endogenous GPR176 knockdown cells and exogenous GPR176 OE cells treated with GNAS plasmid.

**Supplementary Figure 7. Specificity of GPR176 in CRC.**

**A**, Immunofluorescence analysis of LC3B in GPR176 knockdown and overexpressed normal cells. **B**, Expression of GPR176 in bladder cancer, breast cancer and lung cancer.
